# Supplementary material
Source: ML conference proceedings conference paper supplement (https://openreview.net/forum?id=1ajMY3nUKg)
Supplement: supplementary_material [file proximal_rate.pdf › proximal_rate.pdf]

**Theorem 9 (Proximal RRM Convergence)** Suppose the loss  $\ell(z; \theta)$  is  $\beta$ -jointly smooth and  $\gamma$ -strongly convex. If the distribution map  $D(\cdot)$  is  $\epsilon$ -sensitive, then for

$$G(\theta) = \arg \min_{\phi} \mathbb{E}_{z \sim D(\theta)} [\ell(z; \phi)] + \frac{\lambda}{2} \|\theta - \phi\|^2, \quad (54)$$

we have, for all  $\theta, \theta' \in \Theta$ ,

$$\|G(\theta) - G(\theta')\| \leq \frac{\epsilon\beta + \lambda}{\gamma + \lambda} \|\theta - \theta'\|.$$

Furthermore, if  $\frac{\epsilon\beta + \lambda}{\gamma + \lambda} < 1$ , then  $G$  is a contraction, possesses a unique fixed point  $\theta_{PS}$ , and the proximal RRM iterates  $\theta_{t+1} = G(\theta_t)$  converge linearly:

$$\|\theta_t - \theta_{PS}\| \leq \left( \frac{\epsilon\beta + \lambda}{\gamma + \lambda} \right)^t \|\theta_0 - \theta_{PS}\|.$$

**Proof.** Fix  $\theta$  and  $\theta'$ . Let

$$f(\phi) = \mathbb{E}_{z \sim D(\theta)} \ell(z; \phi) + \frac{\lambda}{2} \|\theta - \phi\|^2, \quad f'(\phi) = \mathbb{E}_{z \sim D(\theta')} \ell(z; \phi) + \frac{\lambda}{2} \|\theta' - \phi\|^2.$$

Because  $\ell(z; \phi)$  is  $\gamma$ -strongly convex, both  $f$  and  $f'$  are  $(\gamma + \lambda)$ -strongly convex. Hence

$$f(G(\theta)) - f(G(\theta')) \geq (G(\theta) - G(\theta'))^\top \nabla_{\phi} f(G(\theta')) + \frac{\gamma + \lambda}{2} \|G(\theta) - G(\theta')\|^2, \quad (55)$$

$$f(G(\theta')) - f(G(\theta)) \geq (G(\theta') - G(\theta))^\top \nabla_{\phi} f(G(\theta)) + \frac{\gamma + \lambda}{2} \|G(\theta') - G(\theta)\|^2. \quad (56)$$

Since  $f$  is minimized at  $G(\theta)$ , the inner product in 56 is non-negative. Combining 55 and 56 yields

$$(G(\theta) - G(\theta'))^\top \nabla_{\phi} f(G(\theta')) \leq -(\gamma + \lambda) \|G(\theta) - G(\theta')\|^2. \quad (57)$$

Define the regularized loss

$$\ell_{\theta}(z; \phi) = \ell(z; \phi) + \frac{\lambda}{2} \|\theta - \phi\|^2.$$

The map

$$z \mapsto \frac{(G(\theta) - G(\theta'))^\top \nabla_{\phi} \ell_{\theta}(z; G(\theta'))}{\beta \|G(\theta) - G(\theta')\|}$$

is 1-Lipschitz in  $z$  because of the  $\beta$ -joint smoothness of  $\ell$ . The  $\epsilon$ -sensitivity of  $D(\cdot)$  then implies

$$\sup_{g \text{ is 1-Lip}} |\mathbb{E}_{z \sim D(\theta)} g(z) - \mathbb{E}_{z \sim D(\theta')} g(z)| \leq \epsilon \|\theta - \theta'\|. \quad (58)$$

Using the 1-Lipschitz function above in 58 gives

$$\left| \frac{(G(\theta) - G(\theta'))^\top}{\beta \|G(\theta) - G(\theta')\|} (\mathbb{E}_{z \sim D(\theta)} \nabla_{\phi} \ell_{\theta}(z; G(\theta')) - \mathbb{E}_{z \sim D(\theta')} \nabla_{\phi} \ell_{\theta}(z; G(\theta'))) \right| \leq \epsilon \|\theta - \theta'\|.$$

Unfolding  $\ell_{\theta}$  and rearranging, we obtain

$$\begin{aligned} -\epsilon\beta \|\theta - \theta'\| \|G(\theta) - G(\theta')\| &\leq (G(\theta) - G(\theta'))^\top [\nabla_{\phi} f(G(\theta')) - \nabla_{\phi} f'(G(\theta'))] \\ &\quad + \lambda(G(\theta) - G(\theta'))^\top (\theta' - \theta). \end{aligned} \quad (59)$$

Since  $G(\theta')$  minimizes  $f'$ , we have  $(G(\theta) - G(\theta'))^\top \nabla_{\phi} f'(G(\theta')) \geq 0$ . Thus

$$\begin{aligned} -\epsilon\beta \|\theta - \theta'\| \|G(\theta) - G(\theta')\| &\leq (G(\theta) - G(\theta'))^\top \nabla_{\phi} f(G(\theta')) \\ &\quad + \lambda \|G(\theta) - G(\theta')\| \|\theta - \theta'\| \end{aligned} \quad (60)$$

by the Cauchy-Schwarz inequality. Combining 59 and 60 gives

$$(-\epsilon\beta - \lambda) \|\theta - \theta'\| \|G(\theta) - G(\theta')\| \leq (G(\theta) - G(\theta'))^\top \nabla_{\phi} f(G(\theta')), \quad (61)$$

and substituting the upper bound 57 for the right-hand side yields

$$(-\epsilon\beta - \lambda) \|\theta - \theta'\| \|G(\theta) - G(\theta')\| \leq -(\gamma + \lambda) \|G(\theta) - G(\theta')\|^2. \quad (62)$$

Since  $\|G(\theta) - G(\theta')\| \geq 0$ , dividing both sides of 62 by  $(\gamma + \lambda) \|G(\theta) - G(\theta')\|$  gives

$$\|G(\theta) - G(\theta')\| \leq \frac{\epsilon\beta + \lambda}{\gamma + \lambda} \|\theta - \theta'\|. \quad (63)$$

807 **Stability of the Proximal RRM Solution in Standard RRM**

808 We examine whether the fixed point of the Proximal RRM introduced in Theorem 9 coincides with  
 809 the performatively stable point of RRM.

810 Assume that  $\frac{\epsilon\beta}{\gamma} < 1$ , Under this condition, a performatively stable point of RRM exists and it's  
 811 unique. Because the proximal term vanishes at  $\phi = \theta_{PS}$ , optimality of  $\theta_{PS}$  yields

$$\mathbb{E}_{z \sim \mathcal{D}(\theta_{PS})} \ell(z; \theta_{PS}) \leq \mathbb{E}_{z \sim \mathcal{D}(\theta_{PS})} \ell(z; \phi) \leq \mathbb{E}_{z \sim \mathcal{D}(\theta_{PS})} \ell(z; \phi) + \frac{\lambda}{2} \|\theta_{PS} - \phi\|^2 \quad \forall \phi.$$

812 Hence

$$\theta_{PS} = \arg \min_{\phi} \mathbb{E}_{z \sim \mathcal{D}(\theta_{PS})} \ell(z; \phi) + \frac{\lambda}{2} \|\theta_{PS} - \phi\|^2, \quad (64)$$

813 so  $\theta_{PS}$  is also a fixed point of the Proximal RRM.

814 Note that, for any  $\lambda > 0$ ,

$$\frac{\epsilon\beta}{\gamma} \leq 1 \implies \frac{\epsilon\beta + \lambda}{\gamma + \lambda} \leq 1. \quad (65)$$

815 By Theorem 9, inequality 65 guarantees that the Proximal RRM admits a *unique* fixed point, denoted  
 816 by  $\theta_{PS}^\lambda$ . Since  $\theta_{PS}$  satisfies 64 and the minimiser of 64 is unique, we conclude

$$\theta_{PS}^\lambda = \theta_{PS}.$$

817 Thus, under  $\frac{\epsilon\beta}{\gamma} < 1$ , the performatively stable solution of RRM is identical to the unique fixed point  
 818 of the Proximal RRM.
